# Supplementary material for: Analysis of the inhibitors of apoptosis identifies BIRC3 as a facilitator of malignant progression in glioma
Source: PubMed Central journal article supplement (PMC5355046; doi:10.18632/oncotarget.8657), 2016-04-08
Supplement: oncotarget-08-12695-s001.pdf [file oncotarget-08-12695-s001.pdf]

**SUPPLEMENTARY FIGURE AND TABLES**

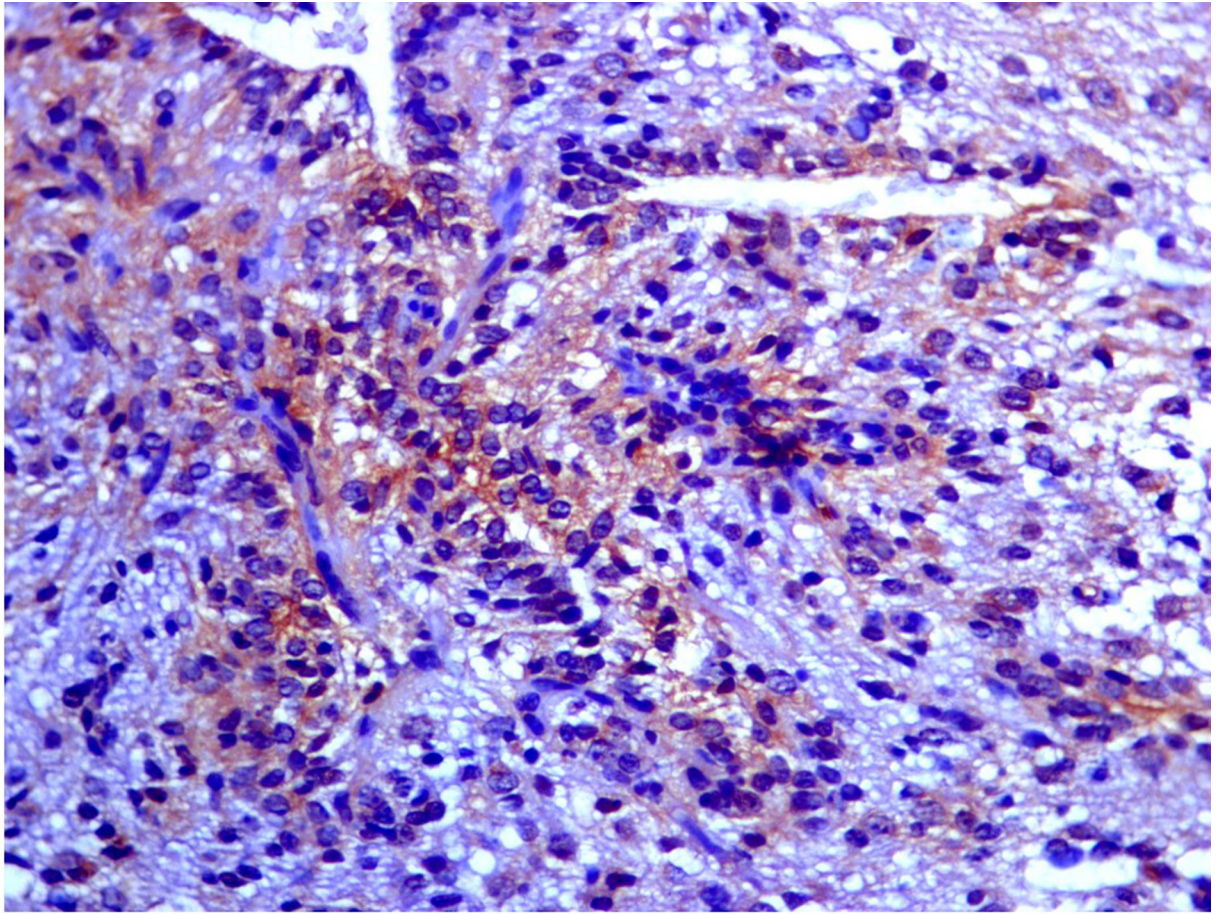

**Supplementary Figure S1: BIRC3 staining in a HGG induced by PDGFB+BIRC3. 400X magnification.**

**Supplementary Table S1: Differential RNA expression levels of IAPs in LGG and GBM**

| <b>Gene</b> | <b>LGG Expression (Mean)</b> | <b>GBM Expression (Mean)</b> | <b>Fold Change</b> |
|-------------|------------------------------|------------------------------|--------------------|
| BIRC1       | 0.000693555                  | 0.001361643                  | -0.000668088       |
| BIRC2       | 1.926767542                  | 2.208344969                  | -0.281577427       |
| BIRC3       | 1.000403772                  | 1.548315026                  | -0.547911254       |
| BIRC4       | 0.743276347                  | 1.542989543                  | -0.799713197       |
| BIRC5       | 0.124728973                  | 0.002655731                  | 0.122073242        |
| BIRC6       | 0.009806117                  | 0.010080691                  | -0.000274574       |
| BIRC7       | 3.942221594                  | 3.515346676                  | 0.426874917        |
| BIRC8       | 0.00452855                   | 0.003870621                  | 0.000657928        |

**Supplementary Table S2: Comparison of median survival between expressors and non expressors of IAPs (excluding BIRC5) in TCGA Low-grade glioma patients**

| IAP   | Median Survival Expressor (months) | Median Survival Non-expressor (months) | Log rank test p value |
|-------|------------------------------------|----------------------------------------|-----------------------|
| BIRC1 | 75.1                               | 87.4                                   | 0.85                  |
| BIRC2 | 41.1                               | 105.1                                  | 0.0000025             |
| BIRC3 | 26.7                               | 94.5                                   | 0.00018               |
| BIRC4 | 105.12                             | 78.2                                   | 0.33                  |
| BIRC6 | N/A                                | 87.4                                   | 0.35                  |
| BIRC7 | 26.74                              | 87.4                                   | 0.71                  |
| BIRC8 | 133.6                              | 94.5                                   | 0.71                  |

**Supplementary Table S3: Comparison of median survival between expressors and non expressors of IAPs (excluding BIRC5) in TCGA High-grade glioma patients**

| IAP   | Median Survival Expressor (months) | Median Survival Non-expressor (months) | Log rank test p value |
|-------|------------------------------------|----------------------------------------|-----------------------|
| BIRC1 | 14.3                               | 13                                     | 0.37                  |
| BIRC2 | 12.2                               | 14.2                                   | 0.07                  |
| BIRC3 | 11.7                               | 14.3                                   | 0.01                  |
| BIRC4 | 14.3                               | 12.9                                   | 0.37                  |
| BIRC6 | 12.6                               | 14                                     | 0.38                  |
| BIRC7 | 12.6                               | 14.5                                   | 0.27                  |
| BIRC8 | 14.1                               | 11.7                                   | 0.42                  |

**Supplementary Table S4: Difference in BIRC3 expression between matched LGG and HGG samples based on the number of positive tumor cells in 5 non-overlapping fields from each tumor**

| Paired Sample | LGG                 | HGG               | T Test P value |
|---------------|---------------------|-------------------|----------------|
| 1             | 0.04481 ± 0.006423  | 0.1842 ± 0.03067  | 0.0021         |
| 2             | 0.007794 ± 0.001970 | 0.6065 ± 0.1010   | 0.0004         |
| 3             | 0.001950 ± 0.001950 | 0.3090 ± 0.06580  | 0.0011         |
| 4             | 0.0 ± 0.0           | 0.06264 ± 0.02174 | 0.0205         |
| 5             | 0.04546 ± 0.01251   | 0.1910 ± 0.08549  | 0.1305         |
| 6             | 0.0 ± 0.0           | 0.1756 ± 0.04122  | 0.0028         |
| 7             | 0.0 ± 0.0           | 0.1508 ± 0.02978  | 0.0010         |
| 8             | 0.01164 ± 0.01164   | 0.08244 ± 0.01392 | 0.0056         |
